# Supplementary material for: Effect and Safety of Meropenem–Vaborbactam versus Best-Available Therapy in Patients with Carbapenem-Resistant Enterobacteriaceae Infections: The TANGO II Randomized Clinical Trial
Source: Springer Nature journal article supplement (doi:10.1007/s40121-018-0214-1), 2018-09-30
Supplement: MOESM1 [file 16165230]

**Manuscript Title:**

**Effect and Safety of Meropenem-Vaborbactam vs Best Available Therapy in Patients with Carbapenem-resistant Enterobacteriaceae Infections: The TANGO II Randomized Clinical Trial**

**eTables**

- **eTable 1.** Eligibility Criteria for Each Infection Type
- **eTable 2.** Baseline Demographic and Clinical Characteristics (MITT)
- **eTable 3.** Microbiology and MIC distributions of Baseline Pathogens (mCRE-MITT)
- **eTable 4.** Antibiotic Regimens in Best Available Therapy (mCRE-MITT)
- **eTable 5.** Primary Infection Type, Initial BAT Regimen, Baseline Pathogen, and MICs for BAT for Subjects in BAT Group (mCRE-MITT Population)
- **eTable 6.** TEAEs associated with Day-28 All-Cause Mortality (mCRE-MITT)
- **eTable 7.** Efficacy Outcomes by Infection Type (mCRE- MITT)
- **eTable 8.** Efficacy Endpoints Among All Patients who Received  $\geq 1$  dose of study drug (MITT)
- **eTable 9.** Efficacy Endpoints Among All Patients with a Confirmed Pathogen (m-MITT)

**eTable 1. Eligibility Criteria for Each Infection Type**

**cUTI**

Expectation, in the judgment of the investigator, that any indwelling urinary catheter or instrumentation (including nephrostomy tubes and/or indwelling stents) would be removed or replaced (if removal was not clinically acceptable) before or as soon as possible, but not longer than 12 hours, after randomization, AND:

| <b>Indication</b> | <b>At least ONE of the following:</b>                                                                                                                                                                                                                                                                                                                                                                                                                                                                          | <b>AND at least TWO of the following signs or symptoms:</b>                                                                                                                                                                                                                                                                                                                                                                                                                                                                                                                                         | <b>AND at least ONE of the following:</b>                                                                                                                                                                                                     |
|-------------------|----------------------------------------------------------------------------------------------------------------------------------------------------------------------------------------------------------------------------------------------------------------------------------------------------------------------------------------------------------------------------------------------------------------------------------------------------------------------------------------------------------------|-----------------------------------------------------------------------------------------------------------------------------------------------------------------------------------------------------------------------------------------------------------------------------------------------------------------------------------------------------------------------------------------------------------------------------------------------------------------------------------------------------------------------------------------------------------------------------------------------------|-----------------------------------------------------------------------------------------------------------------------------------------------------------------------------------------------------------------------------------------------|
| <b>cUTI</b>       | <ul style="list-style-type: none"> <li>• Indwelling urinary catheter</li> <li>• Neurogenic bladder with presence or history of urine residual volume of <math>\geq 100</math> mL</li> <li>• Obstructive uropathy (eg, nephrolithiasis, tumor, fibrosis) that was expected to be medically or surgically treated within 48 hours after randomization</li> <li>• Azotemia due to intrinsic renal disease</li> <li>• Urinary retention in men due to previously diagnosed benign prostatic hypertrophy</li> </ul> | <ul style="list-style-type: none"> <li>• Chills, rigors, or fever* (oral or tympanic temperature <math>\geq 38^{\circ}\text{C}</math> [<math>\geq 100.4^{\circ}\text{F}</math>] or rectal/core temperature <math>\geq 38.3^{\circ}\text{C}</math> [<math>\geq 100.9^{\circ}\text{F}</math>])</li> <li>• Elevated WBC count (<math>&gt;10,000</math> cells/<math>\mu\text{L}</math>) or left shift (<math>&gt;15\%</math> immature PMNs)</li> <li>• Nausea or vomiting</li> <li>• Dysuria, increased urinary frequency, or urinary urgency</li> <li>• Lower abdominal pain or pelvic pain</li> </ul> | <ul style="list-style-type: none"> <li>• Positive LCE on urinalysis</li> <li>• WBC count <math>\geq 10</math> cells/<math>\mu\text{L}</math> in unspun urine</li> <li>• WBC count <math>\geq 10</math> cells/hpf in urine sediment</li> </ul> |

**AP**

Expectation, in the judgment of the investigator, that any indwelling urinary catheter or instrumentation (including nephrostomy tubes and/or indwelling stents) would be removed or replaced (if removal was not clinically acceptable) before or as soon as possible, but not longer than 12 hours, after randomization, AND:

| <b>Indication</b> | <b>Presence of an ascending tract infection including at least TWO of the following signs or symptoms:</b>                                                                                                                                                                                                                                                                                                                                                                                                                                                                                                                   | <b>AND at least ONE of the following:</b>                                                                                                                                                                                                     |
|-------------------|------------------------------------------------------------------------------------------------------------------------------------------------------------------------------------------------------------------------------------------------------------------------------------------------------------------------------------------------------------------------------------------------------------------------------------------------------------------------------------------------------------------------------------------------------------------------------------------------------------------------------|-----------------------------------------------------------------------------------------------------------------------------------------------------------------------------------------------------------------------------------------------|
| <b>AP</b>         | <ul style="list-style-type: none"> <li>• Chills, rigors, or fever* (oral or tympanic temperature <math>\geq 38^{\circ}\text{C}</math> [<math>\geq 100.4^{\circ}\text{F}</math>] or rectal/core temperature <math>\geq 38.3^{\circ}\text{C}</math> [<math>\geq 100.9^{\circ}\text{F}</math>])</li> <li>• Elevated WBC count (<math>&gt;10,000/\mu\text{L}</math>), or left shift (<math>&gt;15\%</math> immature PMNs)</li> <li>• Nausea or vomiting</li> <li>• Dysuria, increased urinary frequency, or urinary urgency</li> <li>• Flank pain</li> <li>• Costo-vertebral angle tenderness on physical examination</li> </ul> | <ul style="list-style-type: none"> <li>• Positive LCE on urinalysis</li> <li>• WBC count <math>\geq 10</math> cells/<math>\mu\text{L}</math> in unspun urine</li> <li>• WBC count <math>\geq 10</math> cells/hpf in urine sediment</li> </ul> |

**clAI**

Subjects were enrolled approximately 24 hours before or 96 hours after the surgical procedure when the following conditions were met:

- Expectation, in the judgment of the investigator, that operative drainage/debridement/removal (including open laparotomy, percutaneous drainage, or laparoscopic surgery) of any intra-abdominal collection or other potential source of intra-abdominal infection would be performed
- Expectation that cultures from the aforementioned procedure (including open laparotomy, percutaneous drainage, or laparoscopic surgery) would be sent for microbiological evaluation, including gram stain, culture and susceptibility testing, and meropenem 2 g-vaborbactam 2 g susceptibility testing

AND:

---

| <b>Indication</b> | <b>At least ONE of the following, either on intra-operative visualization of infection (eg, pus within the abdominal cavity) OR supportive radiographic imaging :</b>                                                                                                                                                                                                                                                                             | <b>AND at least ONE of the following:</b>                                                                                                                                                                                                                                                                                                                                                                                                                                            |
|-------------------|---------------------------------------------------------------------------------------------------------------------------------------------------------------------------------------------------------------------------------------------------------------------------------------------------------------------------------------------------------------------------------------------------------------------------------------------------|--------------------------------------------------------------------------------------------------------------------------------------------------------------------------------------------------------------------------------------------------------------------------------------------------------------------------------------------------------------------------------------------------------------------------------------------------------------------------------------|
| <b>clAI</b>       | <ul style="list-style-type: none"> <li>• Intra-abdominal abscess, including splenic or hepatic abscess</li> <li>• Appendicitis or diverticulitis with peritonitis, perforation, or abscess</li> <li>• Perforation of stomach or intestine, associated with peritonitis, abscess, or fecal contamination</li> <li>• Cholecystitis or cholangitis with perforation, abscess, or progression beyond the gallbladder wall or biliary tract</li> </ul> | <ul style="list-style-type: none"> <li>• Chills, rigors, or fever* (oral or tympanic temperature <math>\geq 38^{\circ}\text{C}</math> [<math>\geq 100.4^{\circ}\text{F}</math>] or rectal/core temperature <math>\geq 38.3^{\circ}\text{C}</math>)</li> <li>• Hypotension, systolic BP <math>&lt; 90</math> mmHg</li> <li>• Abdominal pain or tenderness</li> <li>• Nausea or vomiting</li> <li>• Abdominal mass on clinical examination</li> <li>• Altered mental status</li> </ul> |

---

**HABP**

| <b>Indication</b> | <b>All of the following:</b>                                                                                                                                                                                                                                                                                                                                                                                                                                                                                                                                                                           | <b>AND signs or symptoms evidenced by at least TWO of the following:</b>                                                                                                                                                                                                                                                                                                                                                                                                                                                                                                                                                                                 | <b>AND at least ONE of the following:</b>                                                                                                                                                                                                                                                                                                                                                                                                                                  |
|-------------------|--------------------------------------------------------------------------------------------------------------------------------------------------------------------------------------------------------------------------------------------------------------------------------------------------------------------------------------------------------------------------------------------------------------------------------------------------------------------------------------------------------------------------------------------------------------------------------------------------------|----------------------------------------------------------------------------------------------------------------------------------------------------------------------------------------------------------------------------------------------------------------------------------------------------------------------------------------------------------------------------------------------------------------------------------------------------------------------------------------------------------------------------------------------------------------------------------------------------------------------------------------------------------|----------------------------------------------------------------------------------------------------------------------------------------------------------------------------------------------------------------------------------------------------------------------------------------------------------------------------------------------------------------------------------------------------------------------------------------------------------------------------|
| <b>HABP</b>       | <ul style="list-style-type: none"> <li>• The onset of symptoms &gt;48 hours after admission or ≤7 days after discharge from an inpatient acute or chronic care facility (eg, LTAC, rehabilitation center, hospital, or skilled nursing home)</li> </ul> <p>OR</p> <ul style="list-style-type: none"> <li>• Admission from LTAC or rehabilitation center or admission from home &lt;7 days after discharge from an LTAC or rehabilitation center</li> <li>• New or evolving infiltrate on chest X-ray obtained within 48 hours prior to randomization and &gt;48 hours after hospitalization</li> </ul> | <ul style="list-style-type: none"> <li>• A new onset of cough (or worsening of baseline cough)</li> <li>• Auscultatory findings consistent with pneumonia/pulmonary consolidation (eg, rales, dullness on percussion, bronchial breath sounds, or egophony)</li> <li>• Dyspnea, tachypnea, or respiratory rate &gt;25/min</li> <li>• Hypoxemia (O<sub>2</sub> saturation &lt;90% or pO<sub>2</sub> &lt;60 mmHg while breathing room air, or worsening of the O<sub>2</sub> saturation/FiO<sub>2</sub>)</li> </ul> <p>OR the following criterion ALONE:</p> <ul style="list-style-type: none"> <li>• New onset need for mechanical ventilation</li> </ul> | <ul style="list-style-type: none"> <li>• Fever* (oral or tympanic temperature ≥38°C [≥100.4°F] or rectal/core temperature ≥38.3°C [≥100.9°F]) OR hypothermia (rectal/core temperature &lt;35°C [&lt;95°F])</li> <li>• Elevated total peripheral WBC count (&gt;10,000/μL)</li> <li>• &gt;15% immature neutrophils (bands) regardless of total peripheral WBC count</li> <li>• Leukopenia (total WBC count &lt;4,500/μL)</li> <li>• Procalcitonin &gt;0.25 μg/mL</li> </ul> |

**VABP**

| <b>Indication</b> | <b>All of the following:</b>                                                                                                                                                                                                                                                                                                                         | <b>AND signs or symptoms evidenced by at least TWO of the following:</b>                                                                                                                                                                                                                                                                                                                                                                        | <b>AND at least ONE of the following:</b>                                                                                                                                                                                                                                                                                                                                                                                                                                              |
|-------------------|------------------------------------------------------------------------------------------------------------------------------------------------------------------------------------------------------------------------------------------------------------------------------------------------------------------------------------------------------|-------------------------------------------------------------------------------------------------------------------------------------------------------------------------------------------------------------------------------------------------------------------------------------------------------------------------------------------------------------------------------------------------------------------------------------------------|----------------------------------------------------------------------------------------------------------------------------------------------------------------------------------------------------------------------------------------------------------------------------------------------------------------------------------------------------------------------------------------------------------------------------------------------------------------------------------------|
| <b>VABP</b>       | <ul style="list-style-type: none"> <li>• The onset of symptoms &gt;48 hours after receiving ventilatory support via an endotracheal (or nasotracheal) tube</li> <li>• Required ventilatory support</li> <li>• New or evolving infiltrate on chest x-ray obtained within 48 hours prior to randomization and &gt;48 hours after intubation</li> </ul> | <ul style="list-style-type: none"> <li>• Auscultatory findings consistent with pneumonia/pulmonary consolidation (eg, rales, dullness on percussion, bronchial breath sounds, or egophony)</li> <li>• An acute change in the ventilator support system to enhance oxygenation, as determined by a worsening O<sub>2</sub> sat/FiO<sub>2</sub> ratio</li> <li>• Increased suctioning</li> <li>• Tracheal aspirate change to purulence</li> </ul> | <ul style="list-style-type: none"> <li>• Fever* (oral or tympanic temperature ≥38°C [≥100.4°F] or rectal/core temperature ≥38.3°C [≥100.9°F]) OR hypothermia (rectal/core temperature &lt;35°C [&lt;95°F])</li> <li>• Elevated total peripheral WBC count (&gt;10,000 cells/μL)</li> <li>• &gt;15% immature neutrophils (bands) regardless of total peripheral WBC count</li> <li>• Leukopenia (total WBC count &lt;4,500 cells/μL)</li> <li>• Procalcitonin &gt;0.25 μg/mL</li> </ul> |

**Bacteremia**

Subjects with bacteremia unrelated to cUTI or AP, cIAI, HABP, or VABP were enrolled when the following conditions were met:

| <b>Indication</b> | <b>All of the following:</b>                                                                         | <b>AND at least ONE of the following:</b>                                                                                                                                                                                                                                                                                                                                                                                                                                                                                                                                                             |
|-------------------|------------------------------------------------------------------------------------------------------|-------------------------------------------------------------------------------------------------------------------------------------------------------------------------------------------------------------------------------------------------------------------------------------------------------------------------------------------------------------------------------------------------------------------------------------------------------------------------------------------------------------------------------------------------------------------------------------------------------|
| <b>Bacteremia</b> | <ul style="list-style-type: none"> <li>• Isolation of a CRE from at least 1 blood culture</li> </ul> | <ul style="list-style-type: none"> <li>• Fever* (oral or tympanic temperature ≥38°C [≥100.4°F] or rectal/core temperature ≥38.3°C [≥100.9°F]) OR hypothermia (rectal/core temperature &lt;35°C [&lt;95°F])</li> <li>• Elevated total peripheral WBC count (&gt;10,000 cells/μL)</li> <li>• &gt;15% immature neutrophils (bands) regardless of total peripheral WBC count (&gt;10,000 cells/μL)</li> <li>• Leukopenia (total WBC &lt;4,500 cells/μL)</li> <li>• Tachycardia &gt;100 bpm</li> <li>• Tachypnea &gt;20 breaths/min</li> <li>• Hypotension, systolic blood pressure &lt;90 mmHg</li> </ul> |

Abbreviations: cUTI = complicated urinary tract infection; hpf = high-power field; LCE = leukocyte esterase; PMN = polymorphonuclear leukocyte; WBC = white blood cell; AP = acute pyelonephritis; BP = blood pressure; cIAI = complicated intra-abdominal infection; FiO<sub>2</sub> = fraction of inspired oxygen; HABP = hospital-acquired bacterial pneumonia; LTAC = long-term acute care; O<sub>2</sub> = oxygen; pO<sub>2</sub> = partial pressure of oxygen; VABP = ventilator-associated bacterial pneumonia; bpm = beats per minute; CRE = carbapenem-resistant Enterobacteriaceae; mmHg = millimeter of mercury.

\*Evidence of fever within 24 hours of the screening visit was acceptable if observed and documented by a health care provider.

| <b>eTable 2. Baseline Demographic and Clinical Characteristics (MITT)</b> |                         |                         |                           |
|---------------------------------------------------------------------------|-------------------------|-------------------------|---------------------------|
| <b>Characteristic</b>                                                     | <b>M-V<br/>(n = 50)</b> | <b>BAT<br/>(n = 25)</b> | <b>Total<br/>(N = 75)</b> |
| Age, mean (SD), y                                                         | 63.6 (15.3)             | 63.2 (13.1)             | 63.5 (14.5)               |
| Age cohort, n (%)                                                         |                         |                         |                           |
| <65 y                                                                     | 26 (52.0)               | 14 (56.0)               | 40 (53.3)                 |
| ≥65 y                                                                     | 11 (22.0)               | 4 (16.0)                | 15 (20.0)                 |
| ≥75 y                                                                     | 13 (26.0)               | 7 (28.0)                | 20 (26.7)                 |
| Female gender, n (%)                                                      | 25 (50.0)               | 7 (28.0)                | 32 (42.7)                 |
| White race, n (%)                                                         | 43 (86.0)               | 22 (88.0)               | 65 (86.7)                 |
| Region, n (%)                                                             |                         |                         |                           |
| North America                                                             | 13 (26.0)               | 10 (40.0)               | 23 (30.7)                 |
| Europe                                                                    | 29 (58.0)               | 13 (52.0)               | 42 (56.0)                 |
| Rest of World <sup>a</sup>                                                | 8 (16.0)                | 2 (8.0)                 | 10 (13.3)                 |
| BMI, mean (SD)                                                            | 27.9 (8.3)              | 27.1 (7.5)              | 27.6 (8.0)                |
| Infection type, n (%)                                                     |                         |                         |                           |
| Bacteremia                                                                | 18 (36.0)               | 9 (36.0)                | 27 (36.0)                 |
| cUTI/AP                                                                   | 23 (46.0)               | 11 (44.0)               | 34 (45.3)                 |
| HABP/VABP                                                                 | 5 (10.0)                | 2 (8.0)                 | 7 (9.3)                   |
| cIAI                                                                      | 4 (8.0)                 | 3 (12.0)                | 7 (9.3)                   |
| Baseline pathogen, n (%) <sup>b</sup>                                     |                         |                         |                           |
| <i>Klebsiella pneumoniae</i>                                              | 30 (60.0)               | 14 (56.0)               | 44 (58.7)                 |
| <i>Escherichia coli</i>                                                   | 3 (6.0)                 | 4 (16.0)                | 7 (9.3)                   |
| <i>Enterobacter cloacae</i> species                                       | 1 (2.0)                 | 2 (8.0)                 | 3 (4.0)                   |
| <i>Proteus mirabilis</i>                                                  | 0 (0.0)                 | 2 (8.0)                 | 2 (2.7)                   |
| <i>Serratia marcescens</i>                                                | 1 (2.0)                 | 1 (4.0)                 | 2 (2.7)                   |
| Enrolled as confirmed CRE, n (%)                                          | 26 (52.0)               | 17 (68.0)               | 43 (57.3)                 |
| Enrolled as suspected CRE, n (%)                                          | 24 (48.0)               | 8 (32.0)                | 32 (42.7)                 |
| Creatinine clearance, mL/min, n (%)                                       |                         |                         |                           |
| ≥50                                                                       | 36 (72.0)               | 14 (56.0)               | 50 (66.7)                 |
| 30–49                                                                     | 6 (12.0)                | 7 (28.0)                | 13 (17.3)                 |
| 20–29                                                                     | 1 (2.0)                 | 2 (8.0)                 | 3 (4.0)                   |
| <20                                                                       | 5 (10.0)                | 0 (0)                   | 5 (6.6)                   |
| Missing                                                                   | 2 (4.0)                 | 2 (8.0)                 | 4 (5.3)                   |
| Charlson Comorbidity Index, n (%)                                         |                         |                         |                           |
| ≤2                                                                        | 8 (16.0)                | 2 (8.0)                 | 10 (13.3)                 |
| 3–4                                                                       | 6 (12.0)                | 4 (16.0)                | 10 (13.3)                 |
| 5                                                                         | 12 (24.0)               | 4 (16.0)                | 16 (21.3)                 |
| ≥6                                                                        | 24 (48.0)               | 15 (60.0)               | 39 (52.0)                 |
| Diabetes mellitus, n (%)                                                  | 18 (36.0)               | 10 (40.0)               | 28 (37.3)                 |
| SIRS, n (%)                                                               | 22 (44.0)               | 10 (40.0)               | 32 (42.7)                 |
| ICU admission, n (%)                                                      | 8 (16.0)                | 6 (24.0)                | 14 (18.7)                 |
| Immunocompromised <sup>c</sup> , n (%)                                    | 14 (28.0)               | 10 (40.0)               | 24 (32.0)                 |
| Prior antibiotic failure <sup>d</sup> , n (%)                             | 10 (20.0)               | 0 (0)                   | 10 (13.3)                 |

Abbreviations: BAT, best available therapy; BMI, body mass index; cIAI, complicated intra-abdominal infection; CRE, carbapenem-resistant Enterobacteriaceae; cUTI/AP, complicated urinary tract infection/acute pyelonephritis; HABP/VABP, hospital-acquired bacterial

pneumonia/ventilator-associated bacterial pneumonia; ICU, intensive care unit; mCRE-MITT, microbiologic carbapenem-resistant Enterobacteriaceae modified intent to treat; M-V, meropenem-vaborbactam; SD, standard deviation; SIRS, systemic inflammatory response syndrome.

<sup>a</sup> Israel, Latin America (Colombia, Brazil, Argentina)

<sup>b</sup> Baseline pathogens listed occurred in 2 or more patients.

<sup>c</sup> Receipt of immunosuppressive medications or bone marrow ablative chemotherapy, underlying lymphoma or leukemia (not in remission), previous transplantation, splenectomy, or presence of neutropenia.

<sup>d</sup> Clinical evidence of prior antimicrobial failure as ascertained by the study investigator at screening and randomization.

**eTable 3. Microbiology and MIC distributions of Baseline Pathogens (mCRE-MITT)**

| Baseline Pathogen <sup>a</sup>      | M-V<br>(n=32)                                                  |           | BAT<br>(n=15)                                                  |           | All<br>(N=47)                                                  |           |
|-------------------------------------|----------------------------------------------------------------|-----------|----------------------------------------------------------------|-----------|----------------------------------------------------------------|-----------|
|                                     | Meropenem<br>MIC <sub>50</sub> (MIC <sub>90</sub> )<br>(µg/mL) | n (%)     | Meropenem<br>MIC <sub>50</sub> (MIC <sub>90</sub> )<br>(µg/mL) | n (%)     | Meropenem<br>MIC <sub>50</sub> (MIC <sub>90</sub> )<br>(µg/mL) | n (%)     |
| <i>Klebsiella pneumoniae</i>        | 32 (>64)                                                       | 29 (90.6) | >32 (>64)                                                      | 12 (80.0) | 32 (>64)                                                       | 41 (87.2) |
| <i>Enterobacter cloacae</i> species | >8 (— <sup>b</sup> )                                           | 1 (3.1)   | >8 (—)                                                         | 2 (13.3)  | >8 (—)                                                         | 3 (6.4)   |
| <i>Escherichia coli</i>             | 4 (—)                                                          | 3 (9.4)   | >16 (—)                                                        | 1 (6.7)   | 4 (—)                                                          | 4 (8.5)   |
| <i>Proteus mirabilis</i>            | —                                                              | 0 (0.0)   | —                                                              | 2 (13.3)  | —                                                              | 2 (4.3)   |
| <i>Serratia marcescens</i>          | —                                                              | 1 (3.1)   | —                                                              | 1 (6.7)   | —                                                              | 2 (4.3)   |
| <i>Elizabethkingia</i> species      | —                                                              | 1 (3.1)   | —                                                              | 0 (0.0)   | —                                                              | 1 (2.1)   |

Abbreviations: BAT, best available therapy; M-V, meropenem-vaborbactam; mCRE-MITT, microbiologic carbapenem-resistant Enterobacteriaceae modified intent to treat; MIC, minimum inhibitory concentration.

<sup>a</sup> 5 patients in the meropenem-vaborbactam group and 4 patients in the BAT group had polymicrobial infections (ie, more than 1 species at baseline).

<sup>b</sup> —, not calculated

| <b>eTable 4. Antibiotic Regimens in BAT Group (N = 15<sup>a</sup>; mCRE-MITT)</b> |                 |
|-----------------------------------------------------------------------------------|-----------------|
|                                                                                   | <b>n, (%)</b>   |
| <b>Monotherapy</b>                                                                | <b>4 (26.7)</b> |
| Aminoglycoside                                                                    | 1 (6.7)         |
| Carbapenem                                                                        | 1 (6.7)         |
| Ceftazidime-Avibactam                                                             | 1 (6.7)         |
| Polymyxin                                                                         | 1 (6.7)         |
| <b>Dual Therapy</b>                                                               | <b>7 (46.7)</b> |
| Carbapenem + Aminoglycoside                                                       | 1 (6.7)         |
| Carbapenem + Polymyxin                                                            | 1 (6.7)         |
| Carbapenem + Tigecycline                                                          | 2 (13.3)        |
| Polymyxin + Aminoglycoside                                                        | 3 (20.0)        |
| <b>Triple Therapy</b>                                                             | <b>1 (6.7)</b>  |
| Carbapenem + Polymyxin + Tigecycline                                              | 1 (6.7)         |
| <b>≥4 Drugs</b>                                                                   | <b>2 (13.3)</b> |
| Carbapenem + Polymyxin + Tigecycline + Aminoglycoside                             | 2 (13.3)        |

Abbreviations: BAT, best available therapy; mCRE-MITT, microbiologic carbapenem-resistant Enterobacteriaceae modified intent to treat.

<sup>a</sup> 1 patient received ceftazidime-avibactam (which was only permitted per protocol as monotherapy) in combination with other antimicrobial agents and is therefore not reflected in this table.

**eTable 5. Primary Infection Type, Initial BAT Regimen, Baseline Pathogen, and MICs for BAT for Subjects in BAT Group (mCRE-MITT Population)**

| <b>Subject</b> | <b>Primary Infection Type</b> | <b>Initial BAT Regimen</b>                           | <b>Pathogen<sup>a</sup></b>       | <b>BAT Agent(s) MIC (µg/mL)</b>   |
|----------------|-------------------------------|------------------------------------------------------|-----------------------------------|-----------------------------------|
| 1              | AP                            | Amikacin 250mg QD;<br>Colistin 2MU q8h               | <i>K. pneumoniae</i>              | Colistin >4<br>Amikacin 16        |
|                |                               |                                                      | <i>P. stuartii</i>                | Colistin >4<br>Amikacin >32       |
| 2              | AP                            | Polymyxin B 850,000 q12h                             | <i>K. pneumoniae</i>              | NA                                |
| 3              | cUTI                          | Gentamicin 360mg IV q24h                             | <i>E. cloacae</i>                 | Gentamicin 4                      |
| 4              | cUTI                          | Meropenem 1g IV q8h;<br>Gentamicin 150 mg IV<br>q24h | <i>E. cloacae</i>                 | Meropenem 8<br>Gentamicin 0.5     |
|                |                               |                                                      | <i>K. pneumoniae</i>              | Meropenem ≤0.03<br>gentamicin 0.5 |
| 5              | Bacteremia                    | Meropenem 1g q8h;<br>Tigecycline 50mg q12h           | <i>P. mirabilis</i> *<br>(screen) | NA                                |
|                |                               |                                                      | <i>P. mirabilis</i><br>(Day1)     | Tigecycline > 4                   |
| 6              | Bacteremia                    | Amikacin 500mg QD;<br>Colistin 9MU 4.5MU q12h        | <i>K. pneumoniae</i> *            | NA                                |



|    |            |                                                                                                   |                        |                                                                |
|----|------------|---------------------------------------------------------------------------------------------------|------------------------|----------------------------------------------------------------|
| 7  | Bacteremia | Colistin 4.5MU q12h;<br>Meropenem 2g q8h;<br>Tigecycline 100mg q12h                               | <i>K. pneumoniae</i>   | Meropenem >64<br>Colistin >4<br>Tigecycline 1                  |
| 8  | Bacteremia | Gentamicin 160 mg QD;<br>Meropenem 1 g q8h                                                        | <i>K. pneumoniae</i>   | Gentamicin 1.0<br>Meropenem 64                                 |
| 9  | Bacteremia | Meropenem 1.5 g q6h;<br>Colistin 4.5 MU q12h;<br>Ertapenem 1g q24h                                | <i>K. pneumoniae</i>   | Colistin >4<br>Ertapenem >16                                   |
| 10 | Bacteremia | Colistin 4.5 MU q12h;<br>Tigecycline 100 mg q12h;<br>Meropenem 2 g q8h;<br>Gentamicin 240 mg q24h | <i>K. pneumoniae</i>   | Colistin 0.25<br>Tigecycline 2<br>Meropenem 64<br>Gentamicin 2 |
| 11 | Bacteremia | Ceftazidime-Avibactam<br>2.5 g q8h                                                                | <i>K. pneumoniae</i>   | Ceftazidime >64;<br>Ceftazidime-Avibactam 2                    |
| 12 | Bacteremia | Meropenem 1 g IV q8h;<br>Ertapenem 1 g IV q24h                                                    | <i>S. marcescens</i>   | Meropenem 0.5<br>Ertapenem 1                                   |
|    |            |                                                                                                   | <i>S. marcescens</i> * | Meropenem > 16<br>Ertapenem >8                                 |
| 13 | VABP       | Colistin 150 mg q12h;<br>Gentamicin 500mg q12h                                                    | <i>K. pneumoniae</i>   | Colistin 0.5<br>Gentamicin 1                                   |
| 14 | cIAI       | Meropenem 1 g IV q8h;<br>Tigecycline 50 mg q12h                                                   | <i>E. coli</i> *       | Meropenem >16<br>Tigecycline NA                                |
|    |            |                                                                                                   | <i>K. pneumoniae</i> * | Meropenem >16<br>Tigecycline NA                                |
| 16 | cIAI       | Ceftazidime-Avibactam<br>2.5g q8h                                                                 | <i>K. pneumoniae</i>   | Ceftazidime >64<br>Ceftazidime-Avibactam 8                     |
|    |            |                                                                                                   | <i>K. pneumoniae</i>   | Ceftazidime >64<br>Ceftazidime-Avibactam 2                     |
|    |            |                                                                                                   | <i>E.coli</i> *        | NA                                                             |

Abbreviations: AP = acute pyelonephritis; BAT = best available therapy; BID = twice daily; cIAI = complicated intra-abdominal infection; cUTI = complicated urinary tract infection; *E. cloacae* = *Enterobacter cloacae*; *E. coli* = *Escherichia coli*; ESBL = extended-spectrum beta-lactamase; g = grams; mCRE-MITT = Microbiological carbapenem-resistant Enterobacteriaceae Modified Intent-to-Treat; mg = milligrams; MIC = minimum inhibitory concentration; m-MITT = microbiological Modified Intent-to-Treat; MU = million units; NA = not available; ND = not determined; q6h = every 6 hours; q8h = every 8 hours; *P. mirabilis* = *Proteus mirabilis*; *P. stuartii* = *Providencia stuartii*; q12h = every 12 hours; q24h = every 24 hours; QD = once daily; *S. marcescens* = *Serratia marcescens*; VABP = ventilator-acquired bacterial pneumonia.

<sup>a</sup>Taken from data from central lab, in cases where isolate not sent to central lab (\*), data obtained from local lab

**eTable 6. TEAEs Associated with Day-28 All-Cause Mortality (mCRE-MITT)**

| Day | Infection Type       | M-V<br>(n = 32)                       |  | Day | Infection Type | BAT<br>(n = 15)     |  |
|-----|----------------------|---------------------------------------|--|-----|----------------|---------------------|--|
|     |                      | AE Preferred Term                     |  |     |                | AE Preferred Term   |  |
| 2   | Bacteremia           | Cardiac arrest                        |  | 3   | Bacteremia     | Sepsis              |  |
| 3   | Bacteremia           | General physical health deterioration |  | 11  | cIAI           | Septic shock        |  |
| 4   | Bacteremia           | Cardiac arrest                        |  | 11  | Bacteremia     | Septic shock        |  |
| 4   | Acute pyelonephritis | Sepsis                                |  | 12  | VABP           | Septic shock        |  |
| 5   | Bacteremia           | Shock hemorrhagic                     |  | 16  | Bacteremia     | Cerebral hemorrhage |  |

Abbreviations: AE, adverse event; BAT, best available therapy; cIAI, complicated intra-abdominal infection; M-V, meropenem-vaborbactam; TEAE, treatment-emergent adverse event; VABP, ventilator-associated bacterial pneumonia.

**eTable 7. Efficacy Outcomes by Infection Type (mCRE- MITT)**

| Outcome                                                  | M-V<br>n/N' (%) | BAT<br>n/N' (%) | Difference <sup>a</sup> | Relative Difference <sup>b</sup> |
|----------------------------------------------------------|-----------------|-----------------|-------------------------|----------------------------------|
| <b>Day-28 All-Cause Mortality<sup>c</sup></b>            |                 |                 |                         |                                  |
| Patients with HABP/VABP and Bacteremia, combined         | 4/20 (22.2)     | 4/9 (44.4)      | -22.2                   | -50.0                            |
| Patients with Bacteremia                                 | 4/14 (28.6)     | 3/8 (37.5)      | -8.9                    | -23.7                            |
| Patients with HABP/VABP                                  | 0/4 (0)         | 1/1 (100)       | -100.0                  | NA                               |
| <b>Overall Success<sup>d</sup> at EOT</b>                |                 |                 |                         |                                  |
| Patients with cUTI/AP                                    | 9/12 (75.0)     | 2/4 (50.0)      | 25.0                    | 50.0                             |
| <b>Overall Success<sup>c,d,e</sup> at TOC (EOT + 7d)</b> |                 |                 |                         |                                  |
| Patients with cUTI/AP                                    | 4/12 (33.3)     | 2/4 (50.0)      | -16.7                   | -33.4                            |
| <b>Clinical Cure at TOC<sup>c</sup></b>                  |                 |                 |                         |                                  |
| Patients with cIAI                                       | 2/2 (100)       | 0/2 (0.0)       | 100                     | NA                               |

Abbreviations: BAT, best available therapy; cIAI, complicated intra-abdominal infection; cUTI, complicated urinary tract infection; HABP, hospital-acquired bacterial pneumonia; EOT, end of treatment; M-V, meropenem-vaborbactam; mCRE-MITT, microbiologic carbapenem-resistant Enterobacteriaceae modified intent to treat; MIC, minimum inhibitory concentration; TOC, test of cure; VABP, ventilator-associated bacterial pneumonia.

<sup>a</sup> Data represent the difference in percentages for meropenem-vaborbactam and BAT.

<sup>b</sup> Data represent (difference in percentage for meropenem-vaborbactam and BAT)/BAT.

<sup>c</sup> Represents regulatory guidance-based primary endpoint for specified infection type/s.

<sup>d</sup> Composite outcome of clinical cure and microbiologic eradication at respective visit.

<sup>e</sup> 4 M-V-treated patients were indeterminate/not assessed at TOC.

**eTable 8. Efficacy Endpoints Among All Patients who Received  $\geq 1$  Dose of Study Drug MITT)**

|                                          | <b>M-V<br/>(n = 50)<br/>n (%)</b> | <b>BAT<br/>(n = 25)<br/>n (%)</b> | <b>Difference<sup>a</sup> (95% CI)</b> | <b>P value</b> |
|------------------------------------------|-----------------------------------|-----------------------------------|----------------------------------------|----------------|
| <b>Patients with All Infection Types</b> |                                   |                                   |                                        |                |
| Clinical Cure at EOT                     | 32 (64.0)                         | 11 (44.0)                         | 20.0 (-3.6 to 43.6)                    | .10            |
| Clinical Cure at TOC                     | 29 (58.0)                         | 9 (36.0)                          | 22.0 (-1.3 to 45.3)                    | .06            |
| Day-28 Mortality                         | 7 (14.0)                          | 5 (20.0)                          | -6.0 (-24.4 to 12.4)                   | .52            |

Abbreviations: BAT, best available therapy; CI, confidence interval; EOT, end of treatment; MITT, modified intent to treat; M-V, meropenem-vaborbactam; TOC, test of cure.

<sup>a</sup> Data represent the difference in percentages for meropenem-vaborbactam and BAT (95% CI for that difference).

**eTable 9. Efficacy Endpoints Among All Patients with a Confirmed Pathogen (m-MITT)**

|                                          | <b>M-V<br/>(n = 35)<br/>n (%)</b> | <b>BAT<br/>(n = 19)<br/>n (%)</b> | <b>Difference<sup>a</sup> (95% CI)</b> | <b>P value</b> |
|------------------------------------------|-----------------------------------|-----------------------------------|----------------------------------------|----------------|
| <b>Patients with All Infection Types</b> |                                   |                                   |                                        |                |
| Clinical Cure at EOT                     | 24 (68.6)                         | 7 (36.8)                          | 31.7 (5.1 to 58.3)                     | .02            |
| Clinical Cure at TOC                     | 21 (60.0)                         | 6 (31.6)                          | 28.4 (2.0 to 54.9)                     | .04            |
| Microbiologic Cure <sup>b</sup> at EOT   | 23 (65.7)                         | 8 (42.1)                          | 23.6 (-3.6 to 50.8)                    | .09            |
| Microbiologic Cure <sup>b</sup> at TOC   | 17 (48.6)                         | 7 (36.8)                          | 11.7 (-15.6 to 39.0)                   | .40            |
| Day-28 Mortality                         | 5 (14.3)                          | 5 (26.3)                          | -12.0 (-35.0 to 10.9)                  | .30            |

Abbreviations: AE, adverse event; BAT, best available therapy; CI, confidence interval; EOT, end of treatment; m-MITT, microbiologic modified intent to treat; M-V, meropenem-vaborbactam; TOC, test of cure.

<sup>a</sup> Data represent the difference in percentages for meropenem-vaborbactam and BAT (95% CI for that difference).

<sup>b</sup> Composite of either microbiologic eradication or presumed eradication at respective visit.
